# Supplementary material for: Correlation Network Analysis Applied to Complex Biofilm Communities
Source: PubMed Central journal article supplement (PMC3233593; doi:10.1371/journal.pone.0028438), 2011-12-07

CLUSTER DENDROGRAM

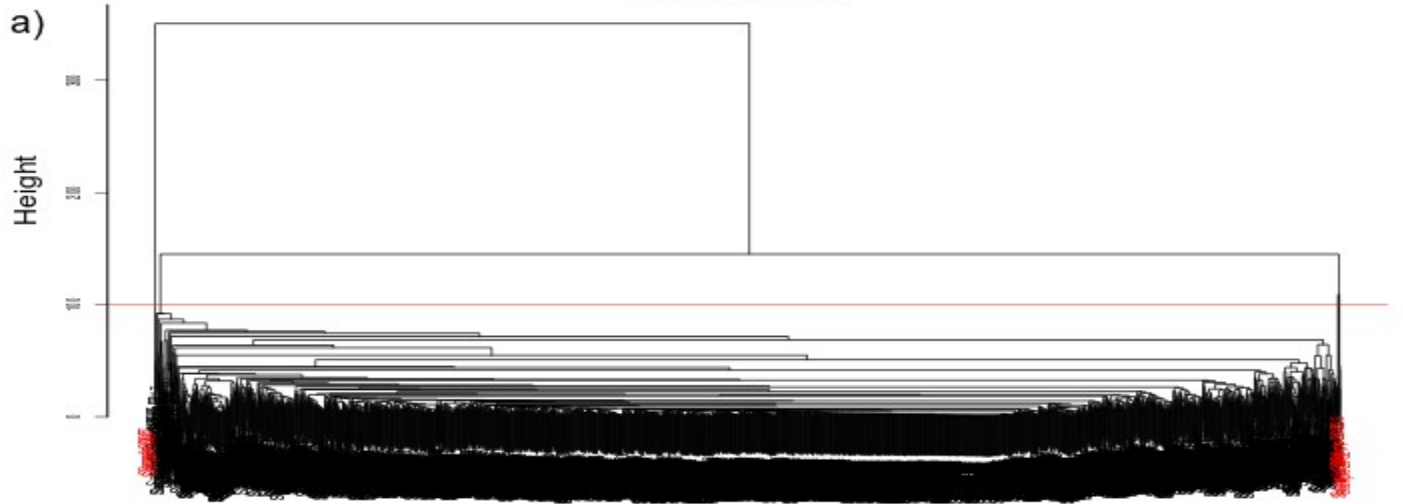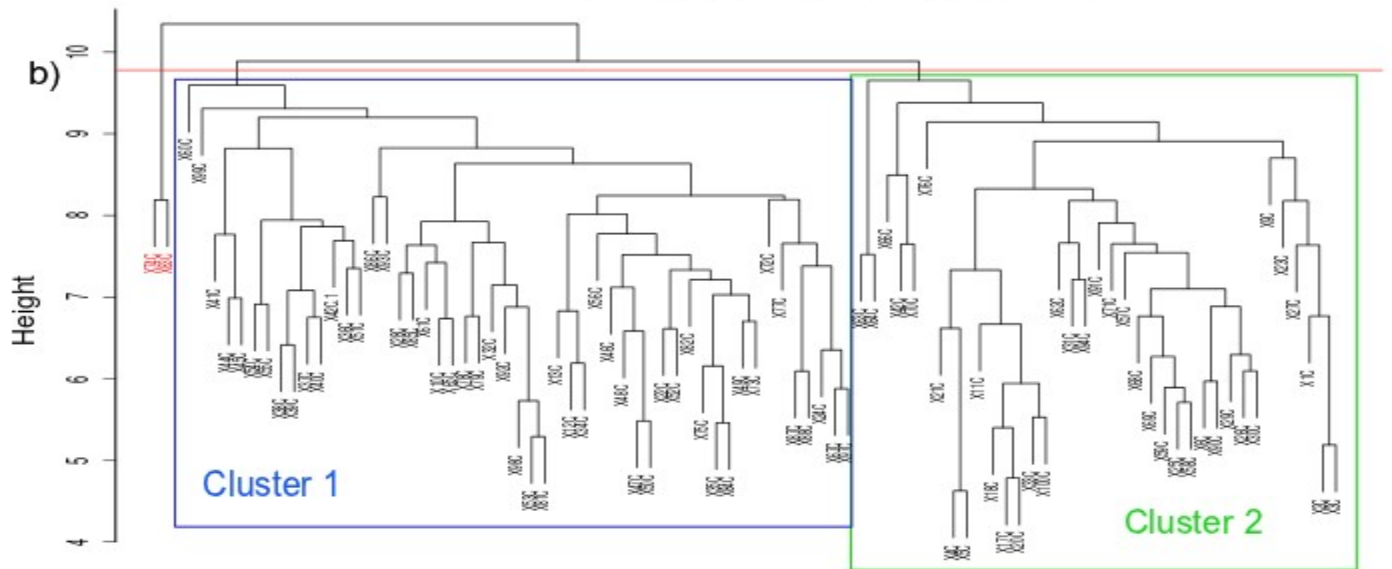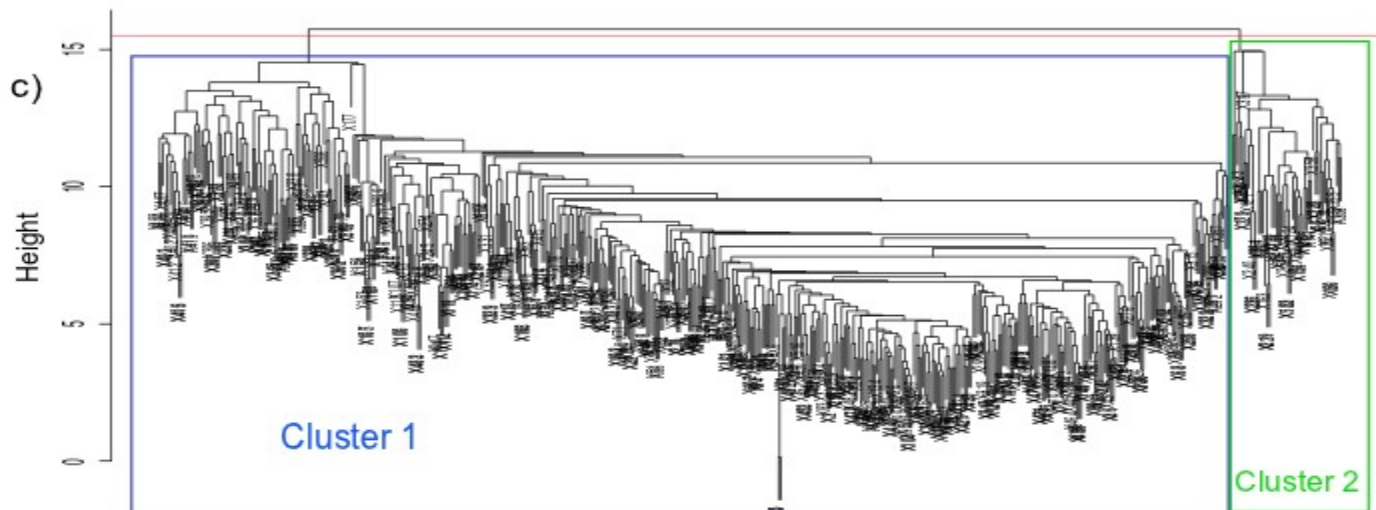

Supplement: pone.0028438.s001.pdf [file pone.0028438.s001.pdf]
