# Supplementary material for: Correlation Network Analysis Applied to Complex Biofilm Communities
Source: PubMed Central journal article supplement (PMC3233593; doi:10.1371/journal.pone.0028438), 2011-12-07

a) Bacterial species

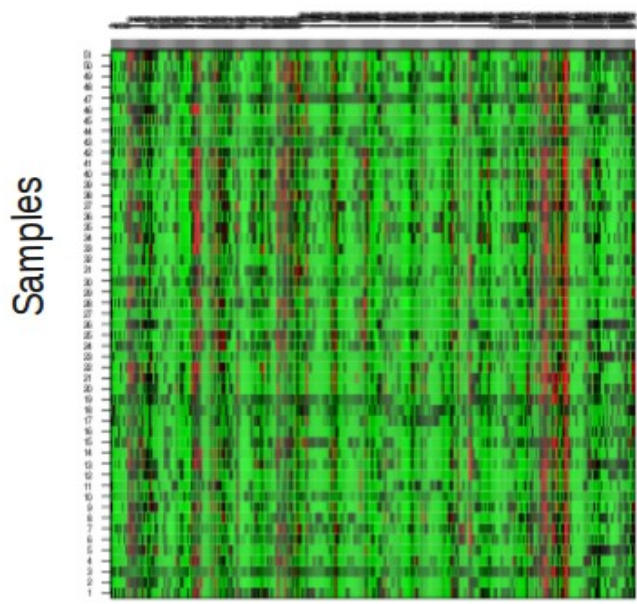

b) Bacterial species

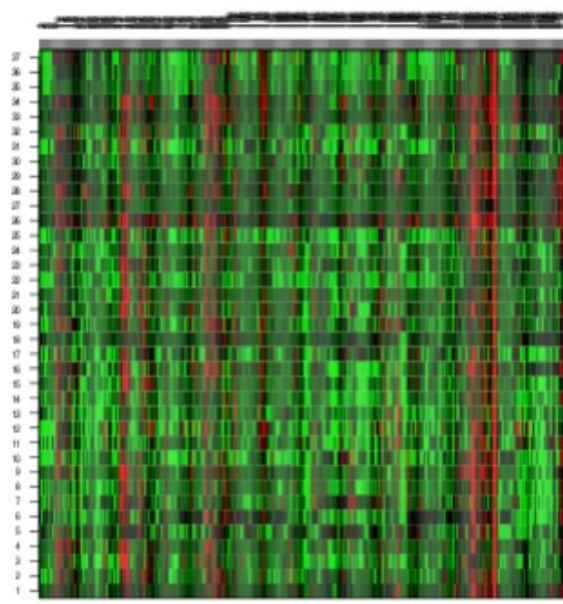

c)

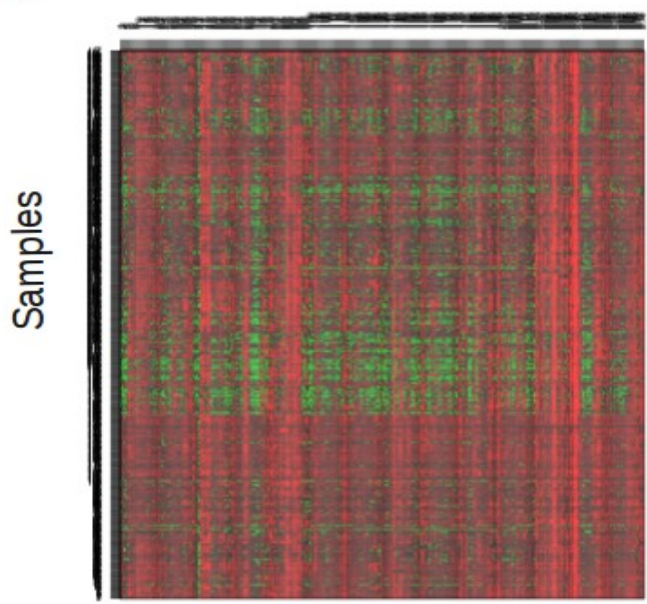

d)

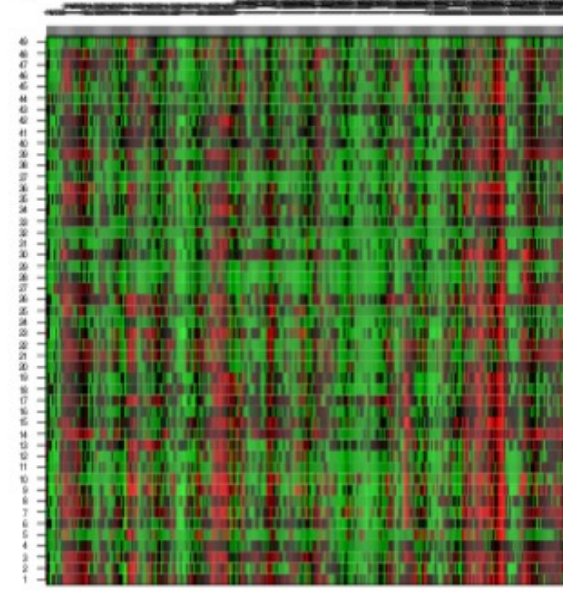

Supplement: pone.0028438.s002.pdf [file pone.0028438.s002.pdf]
